# Supplementary material for: Highly sensitive detection of paraquat with pillar[5]arenes as an aptamer in an α-hemolysin nanopore
Source: Royal Society of Chemistry journal article supplement (doi:10.1039/d1qm00875g), 2021-01-01
Supplement: d1qm00875g1.pdf [file d1qm00875g1.pdf]

## Supporting Information

### Highly Sensitive Detection of Paraquat with Pillar[5]arene as an aptamer in $\alpha$ -Hemolysin Nanopore

Xiaojia Jiang,<sup>a</sup> Mingsong Zang,<sup>a</sup> Fei Li,<sup>a</sup> Chunxi Hou,<sup>a</sup> Quan Luo,<sup>a</sup> Jiayun, Xu<sup>b</sup> and Junqiu Liu<sup>\*a,b</sup>

**Scheme S1:** The synthetic route of Carboxylatopillar[5]arene (CP[5]A)

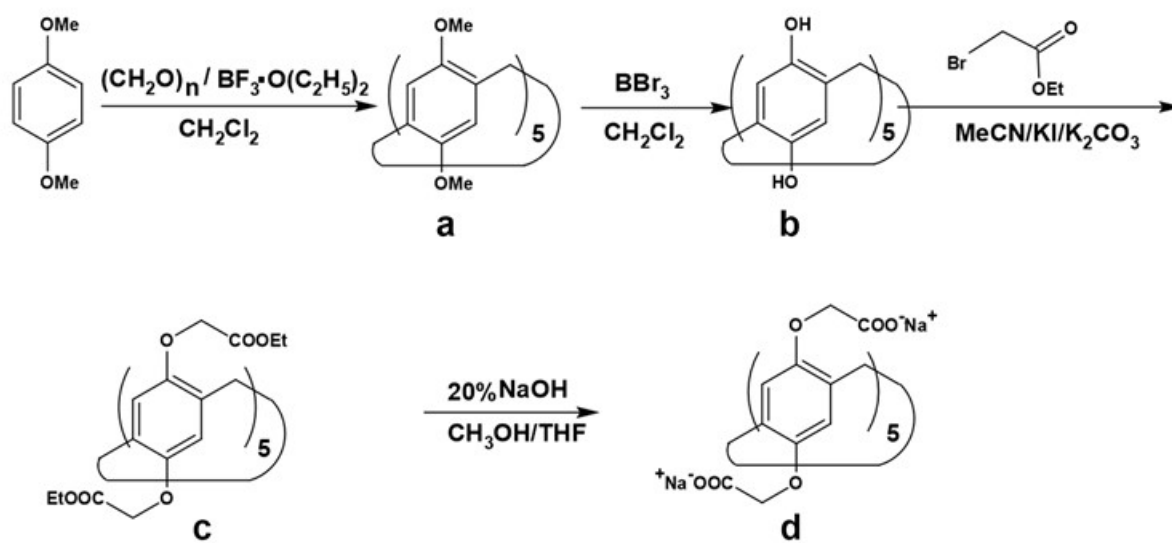

$^1\text{H-NMR}$  spectrum of CP[5]A

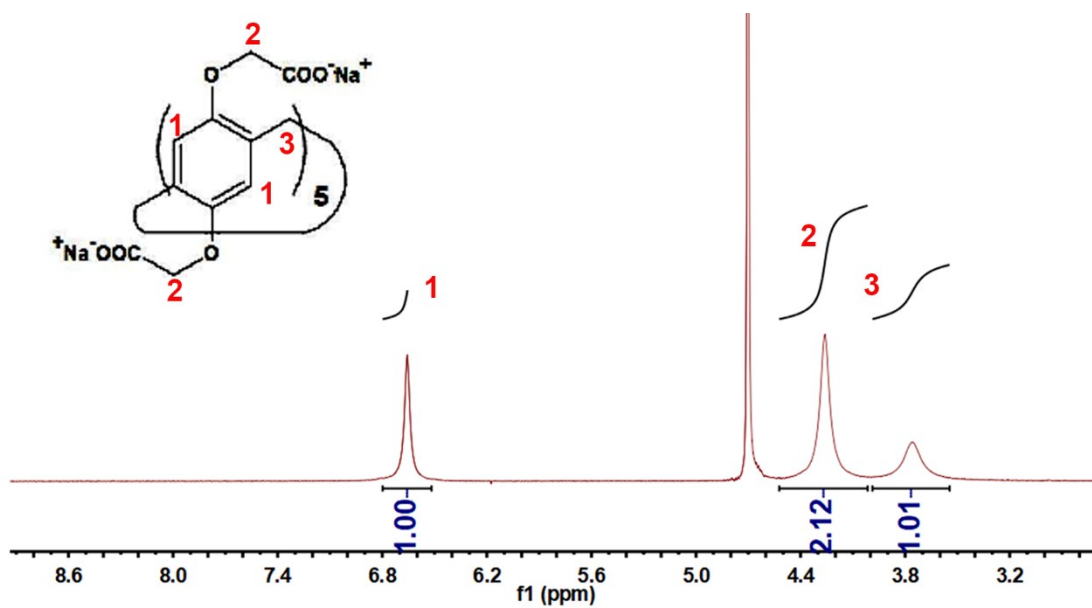

**Fig S1.**  $^1\text{H-NMR}$  spectrum of CP[5]A. (500 MHz,  $\text{D}_2\text{O}$ ,  $\delta$  6.71 (s, 10H), 4.22 (m, 20H), 3.86 (s, 10H).

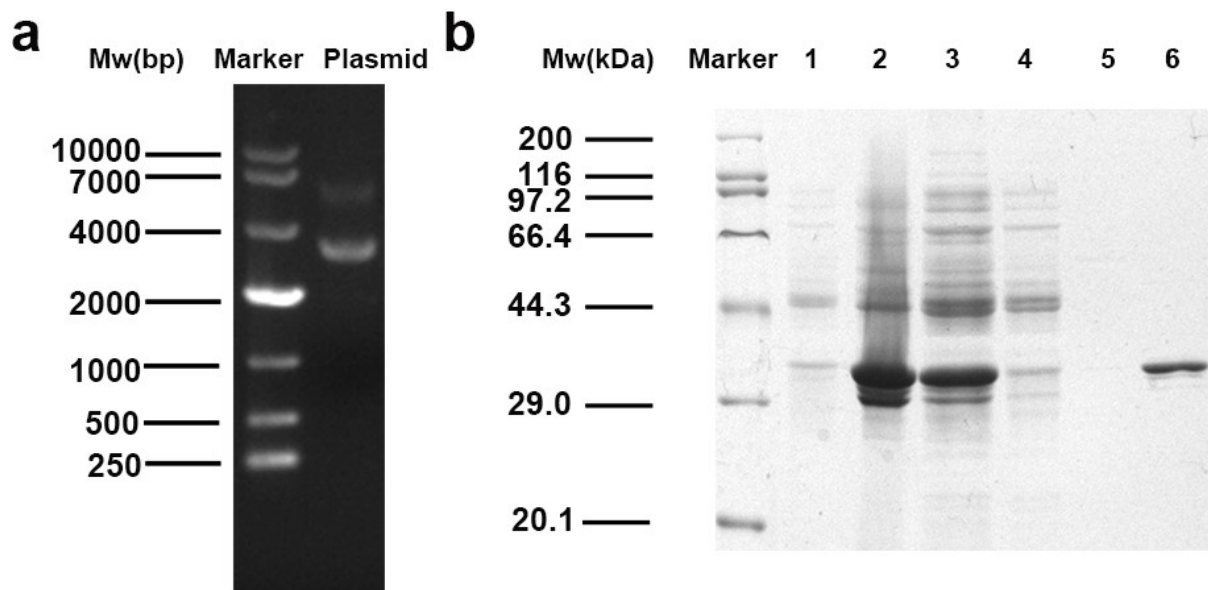

**Fig S2.** a) Agarose gel electrophoresis of PCR product of (E111R/K147R)<sub>7</sub> αHL (left lane: DNA marker; right lane: the plasmid of (E111R/K147R)<sub>7</sub> αHL; b) the SDS-PAGE analysis of (E111R/K147R)<sub>7</sub> αHL protein monomer, the lanes indicated protein marker, induced without IPTG, induced with IPTG, precipitation, supernatant, eluted solution in 20 mM imidazole and purified (E111R/K147R)<sub>7</sub> αHL protein monomer, respectively.

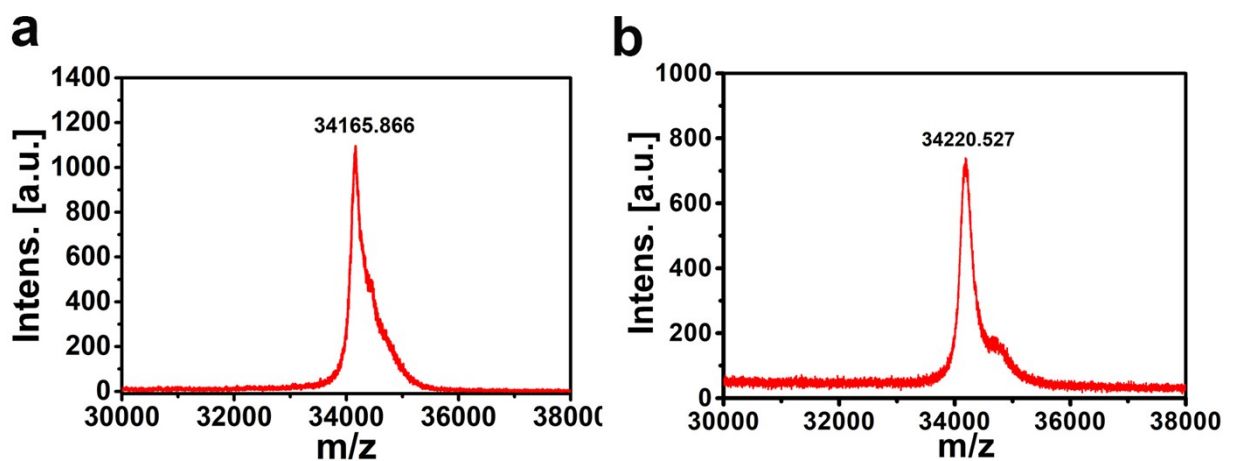

**Fig S3.** MALDI-TOF-MS spectra of wild-type αHL (a) and mutant (E111R/K147R)<sub>7</sub> αHL protein (b).

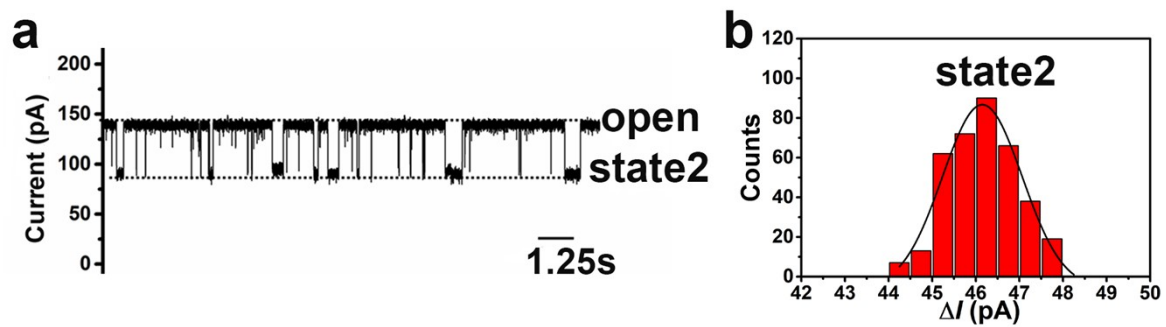

**Fig S4.** a) The characteristic current of state2 of CP[5]A . b) Event histogram of the current reduction of state2 in 30min single-channel current recordings. Gaussian fitting is performed for binding events of state2.

| Concentration ( $\mu\text{M}$ ) | $1/t_{\text{on}}$ ( $\text{s}^{-1}$ ) | $k_{\text{on}}$ ( $\text{M}^{-1}\text{s}^{-1}$ ) | $k_{\text{off}}$ ( $\text{s}^{-1}$ ) | $K_{\text{d}}$ (M)    |
|---------------------------------|---------------------------------------|--------------------------------------------------|--------------------------------------|-----------------------|
| 2.5                             | $4.89 \pm 0.01$                       | $(1.96 \pm 3.11) \times 10^6$                    | $8.87 \pm 0.03$                      | $4.53 \times 10^{-5}$ |
| 5                               | $5.41 \pm 0.02$                       | $(1.08 \pm 2.02) \times 10^6$                    | $8.19 \pm 0.04$                      | $7.58 \times 10^{-5}$ |
| 10                              | $11.57 \pm 0.01$                      | $(1.57 \pm 2.03) \times 10^6$                    | $8.53 \pm 0.01$                      | $5.43 \times 10^{-5}$ |

**Table S1.** The constant for CP[5]A with the mutant (E111R/K147R)<sub>7</sub>  $\alpha\text{HL}$  nanopore.

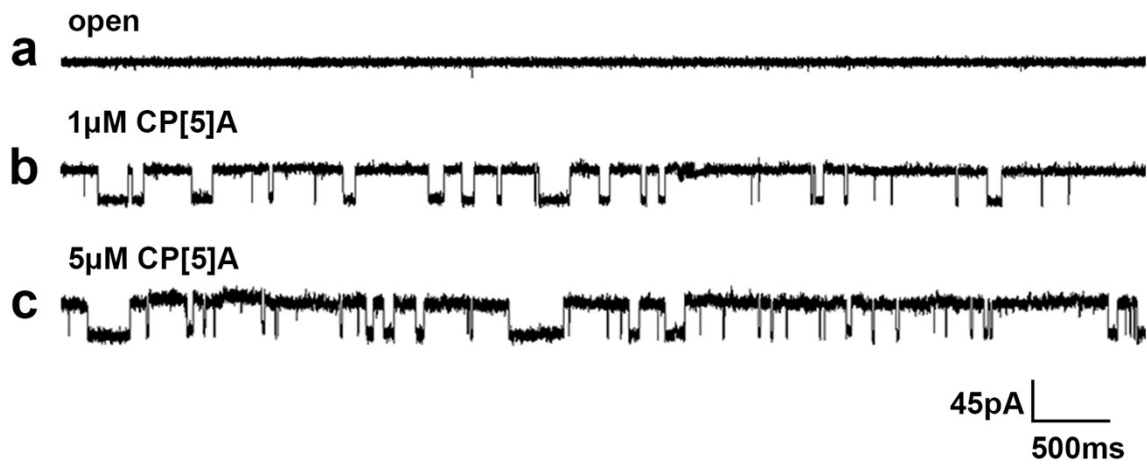

**Fig S5.** The characteristic current of CP[5]A lodged into wild-type  $\alpha$ HL nanopore. a) The open current of wild- type  $\alpha$ HL nanopore without CP[5]A. b, c) The current reduction amplitude of CP[5]A under different concentrations (1  $\mu$ M and 5  $\mu$ M) respectively. Conditions: wild-type  $\alpha$ HL nanopore and CP[5]A were added in cis side, +100 mV.

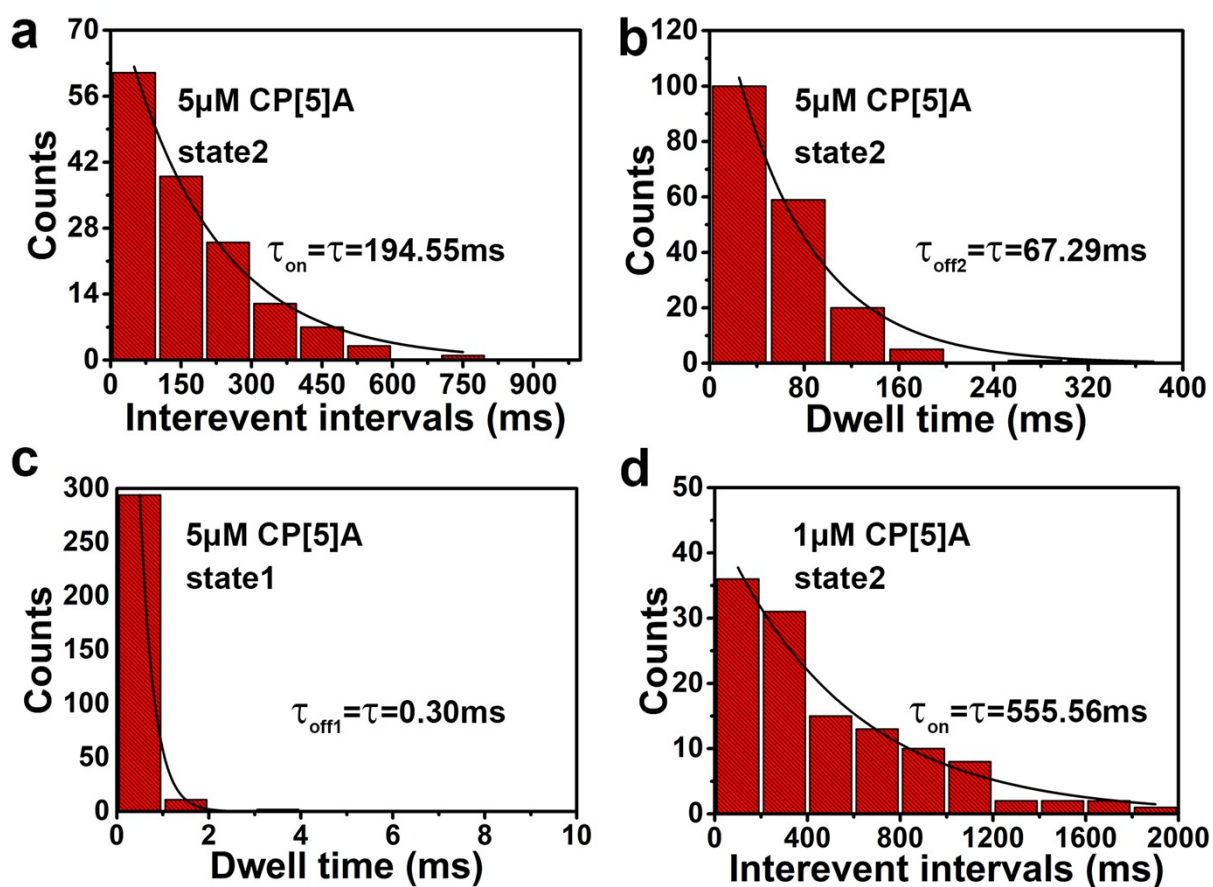

**Fig S6.** a, b and c) Represented the  $\tau_{on}$  and the  $\tau_{off}$  of 5  $\mu$ M CP[5]A binding events lodged into wild-type  $\alpha$ HL nanopore. d) Represented the  $\tau_{on}$  of 1  $\mu$ M CP[5]A binding events lodged into wild-type  $\alpha$ HL nanopore. The statistical data were from a continuous 30min recording.  $\tau_{on}$ ,  $\tau_{off}$  are from three independent experiments ( $n = 3$ ) with 20 min recording for each condition. Conditions: wild-type  $\alpha$ HL nanopore and CP[5]A were added in cis side, +100 mV.

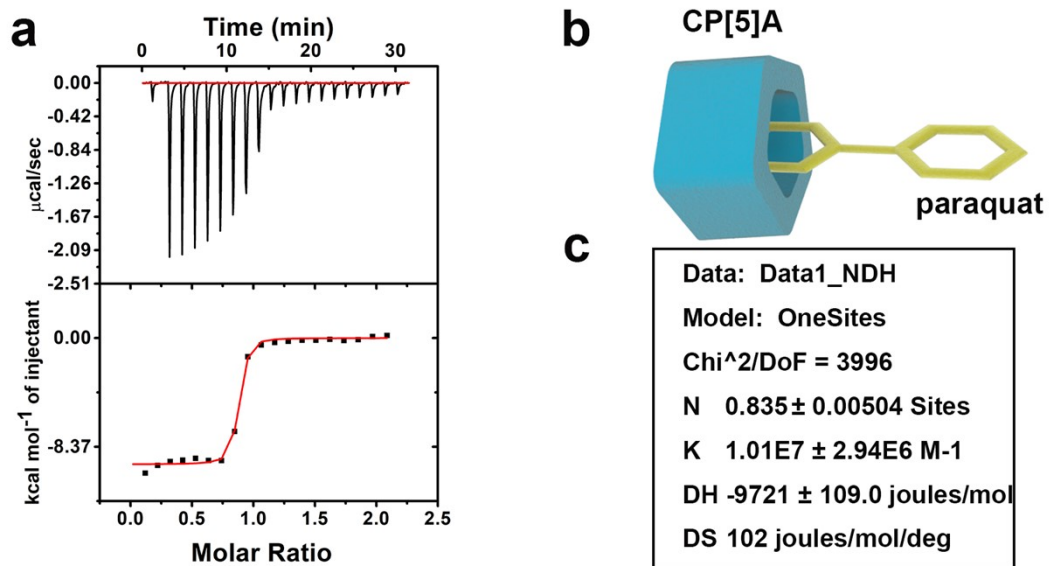

**Fig S7.** The ITC analysis of CP[5]A and PQ. a) The titration curve of CP[5]A and PQ. b) The representation of CP[5]A and PQ. c) The thermodynamic parameters between CP[5]A and PQ.

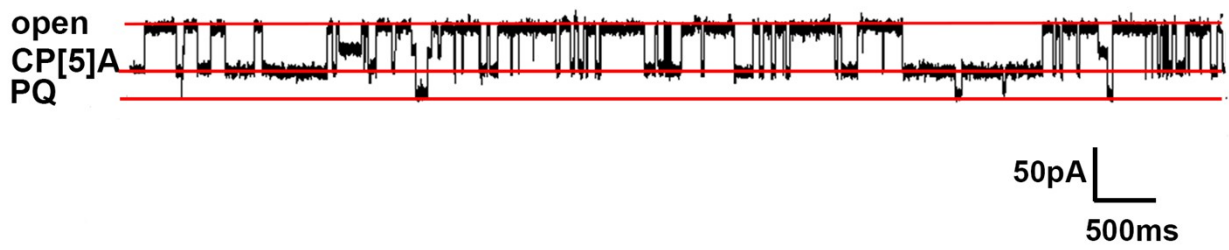

**Fig S8.** a) The characteristic current of PQ when 2 nM PQ was added in trans and 5  $\mu$ M CP[5]A added in cis. Conditions: 1.5 M KCl, +100 mV.
